# Supplementary material for: Indirect Comparison of Lenadogene Nolparvovec Gene Therapy Versus Natural History in Patients with Leber Hereditary Optic Neuropathy Carrying the m.11778G>A MT-ND4 Mutation
Source: Springer Nature journal article supplement (doi:10.1007/s40123-022-00611-x), 2022-11-30
Supplement: MOESM1 [file 40123_2022_611_MOESM1_ESM.pdf]

## **Indirect Comparison of Lenadogene Nolpharovec Gene Therapy versus Natural History in Leber Hereditary Optic Neuropathy Patients Carrying the m.11778G>A *MT-ND4* Mutation**

Valerio Carelli<sup>1,2\*</sup>, Nancy J. Newman<sup>3</sup>, Patrick Yu-Wai-Man<sup>4,5,6,7</sup>, Valerie Biousse<sup>3</sup>, Mark L. Moster<sup>8</sup>, Prem S. Subramanian<sup>9</sup>, Catherine Vignal-Clermont<sup>10,11</sup>, An-Guor Wang<sup>12</sup>, Sean P. Donahue<sup>13</sup>, Bart P. Leroy<sup>14</sup>, Robert C. Sergott<sup>8</sup>, Thomas Klopstock<sup>15,16,17</sup>, Alfredo A. Sadun<sup>18</sup>, Gema Rebolleda Fernández<sup>19</sup>, Bart K. Chwalisz<sup>20</sup>, Rudrani Banik<sup>21</sup>, Jean François Girmens<sup>11</sup>, Chiara La Morgia<sup>1,2</sup>, Adam A. DeBusk<sup>8</sup>, Neringa Jurkute<sup>6,7,22</sup>, Claudia Priglinger<sup>23</sup>, Rustum Karanjia<sup>18,24</sup>, Constant Josse<sup>25</sup>, Julie Salzmann<sup>26</sup>, François Montestruc<sup>25</sup>, Michel Roux<sup>27</sup>, Magali Taiel<sup>27</sup>, and José-Alain Sahel<sup>28,29,30,31</sup> for the LHON Study Group

<sup>1</sup> Istituto di Ricovero e Cura a Carattere Scientifico Istituto delle Scienze Neurologiche di Bologna, Programma di Neurogenetica, Bologna, Italy

<sup>2</sup> Department of Biomedical and Neuromotor Sciences, University of Bologna, Bologna, Italy

<sup>3</sup> Departments of Ophthalmology, Neurology and Neurological Surgery, Emory University School of Medicine, Atlanta, GA, USA

<sup>4</sup> Cambridge Centre for Brain Repair and MRC Mitochondrial Biology Unit, Department of Clinical Neurosciences, University of Cambridge, Cambridge, UK.

<sup>5</sup> Cambridge Eye Unit, Addenbrooke's Hospital, Cambridge University Hospitals, Cambridge, UK.

<sup>6</sup> Moorfields Eye Hospital, NHS Foundation Trust, London, UK

<sup>7</sup> Institute of Ophthalmology, University College London, London, UK

<sup>8</sup> Departments of Neurology and Ophthalmology, Wills Eye Hospital and Thomas Jefferson University, Philadelphia, PA, USA

<sup>9</sup> Sue Anschutz-Rodgers University of Colorado Eye Center, University of Colorado School of Medicine, Aurora, CO, USA

<sup>10</sup> Department of Neuro Ophthalmology and Emergencies, Rothschild Foundation Hospital, Paris, France

<sup>11</sup> Centre d'Investigation Clinique, Centre Hospitalier National d'Ophthalmologie des Quinze Vingts, Paris, France

<sup>12</sup> Department of Ophthalmology, Taipei Veterans General Hospital, National Yang Ming Chiao Tung University, Taipei, Taiwan

<sup>13</sup> Department of Ophthalmology, Neurology, and Pediatrics, Vanderbilt University, and Vanderbilt Eye Institute, Vanderbilt University Medical Center, Nashville, TN, USA

<sup>14</sup> Department of Ophthalmology and Center for Medical Genetics, Ghent University Hospital, and Department of Head & Skin, Ghent University, Ghent, Belgium

<sup>15</sup> Department of Neurology, Friedrich-Baur-Institute, University Hospital, Ludwig-Maximilians-University Munich, Munich, Germany

<sup>16</sup> German Center for Neurodegenerative Diseases (DZNE), Munich, Germany

<sup>17</sup> Munich Cluster for Systems Neurology (SyNergy), Munich, Germany

<sup>18</sup> Doheny Eye Institute, David Geffen, School of Medicine, University of California, Los Angeles, CA, USA

<sup>19</sup> Department of Ophthalmology, Alcala University, Madrid, Spain

<sup>20</sup> Department of Ophthalmology, Massachusetts Eye & Ear, Harvard Medical School, Boston, MA, USA

<sup>21</sup> Department of Ophthalmology, Icahn School of Medicine at Mount Sinai, New York, NY, USA

<sup>22</sup> Department of Neuro-Ophthalmology, The National Hospital for Neurology and Neurosurgery, University College London Hospitals NHS Foundation Trust, London, UK

<sup>23</sup> Department of Ophthalmology, University Hospital, Ludwig-Maximilians-University Munich, Munich, Germany

<sup>24</sup> Department of Ophthalmology, University of Ottawa Eye, Ottawa, ON, Canada

<sup>25</sup> eXYSTAT, Data Management and Statistic, Malakoff, France

<sup>26</sup> Medical and Regulatory Consulting, Paris, France

<sup>27</sup> GenSight Biologics, Paris, France

<sup>28</sup> Sorbonne Université, INSERM, CNRS, Institut de la Vision, Paris, France

<sup>29</sup> Rothschild Foundation Hospital, Paris, France

<sup>30</sup> Department of Ophthalmology, University of Pittsburgh School of Medicine, Pittsburgh, PA, USA

<sup>31</sup> Centre Hospitalier National d'Ophthalmologie des Quinze-Vingts, Institut Hospitalo-Universitaire FOReSIGHT, INSERM-DGOS CIC 1423, Paris, France

\* **Corresponding author:** valerio.carelli@unibo.it

## Supplementary Material Content

|                                                                                                                             |          |
|-----------------------------------------------------------------------------------------------------------------------------|----------|
| <b>Supplementary Figure 1: Evolution of Visual Acuity of Treated Eyes versus Natural History Eyes up to 300 Months.....</b> | <b>3</b> |
| <b>Supplementary Figure 2: Evolution of Visual Acuity of REFLECT Treated Eyes versus Natural History Eyes.....</b>          | <b>4</b> |
| <b>LHON Study Group Information.....</b>                                                                                    | <b>5</b> |

**Supplementary Figure 1: Evolution of Visual Acuity of Treated Eyes versus Natural History Eyes up to 300 Months**

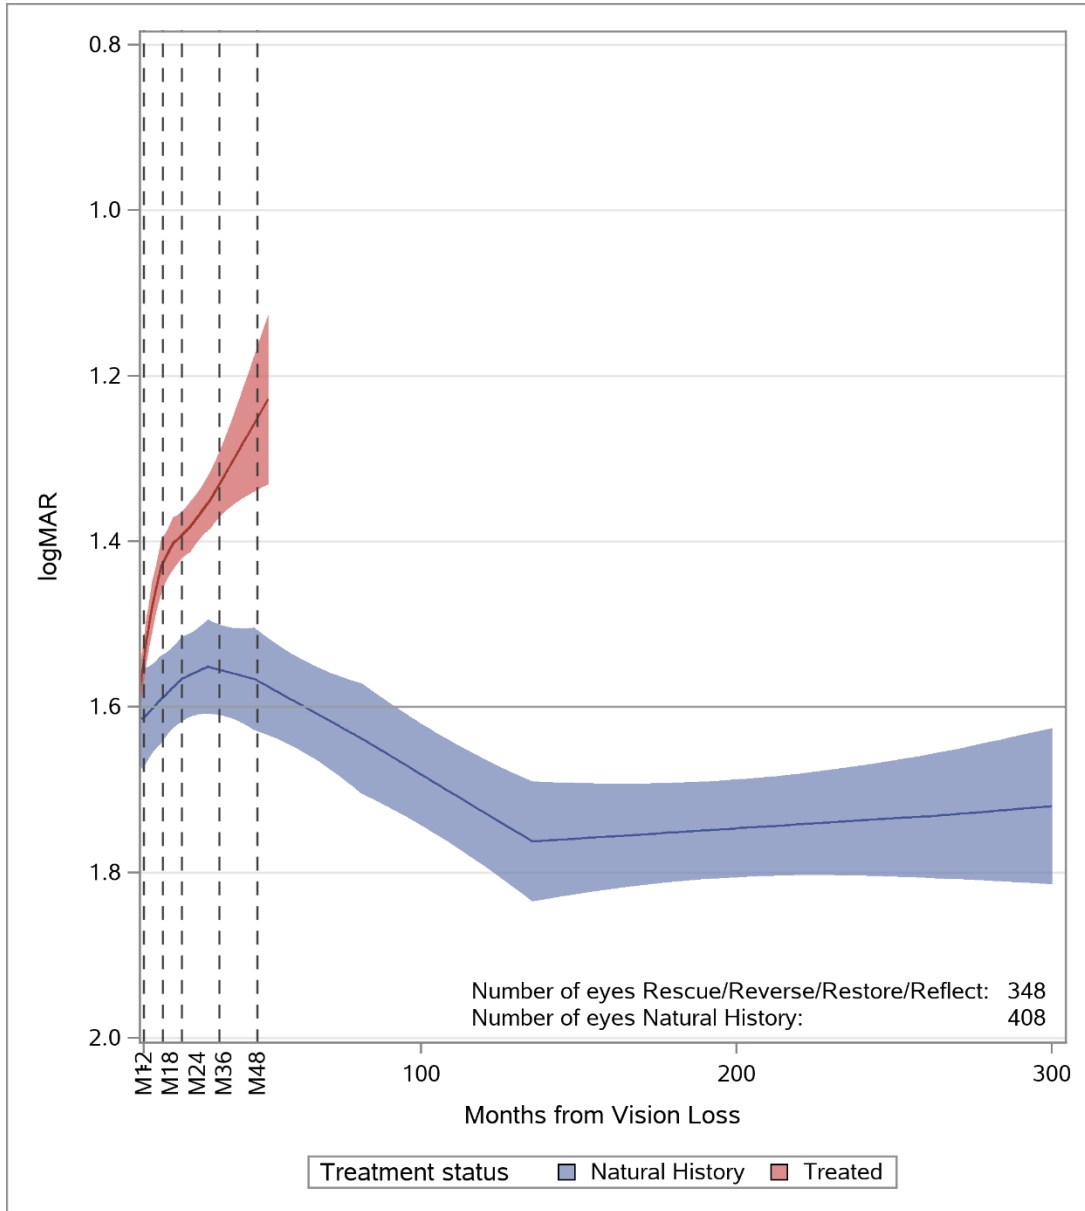

The evolution of visual acuities over time for treated eyes (n=348) and natural history eyes (n=408) was estimated by LOESS regression (solid line) with 95% CI around the fitted curve (shaded area). Visual acuity values > 300 months were assigned to the 300-month timepoint using the next observation carried backward method.

Smoothing parameter: 0.315 for treated eyes and 0.407 for natural history eyes.

The statistically significant difference between treated and natural history eyes is illustrated by the non-overlapping CIs of LOESS curves.

**Supplementary Figure 2: Evolution of Visual Acuity of REFLECT Treated Eyes versus Natural History Eyes**

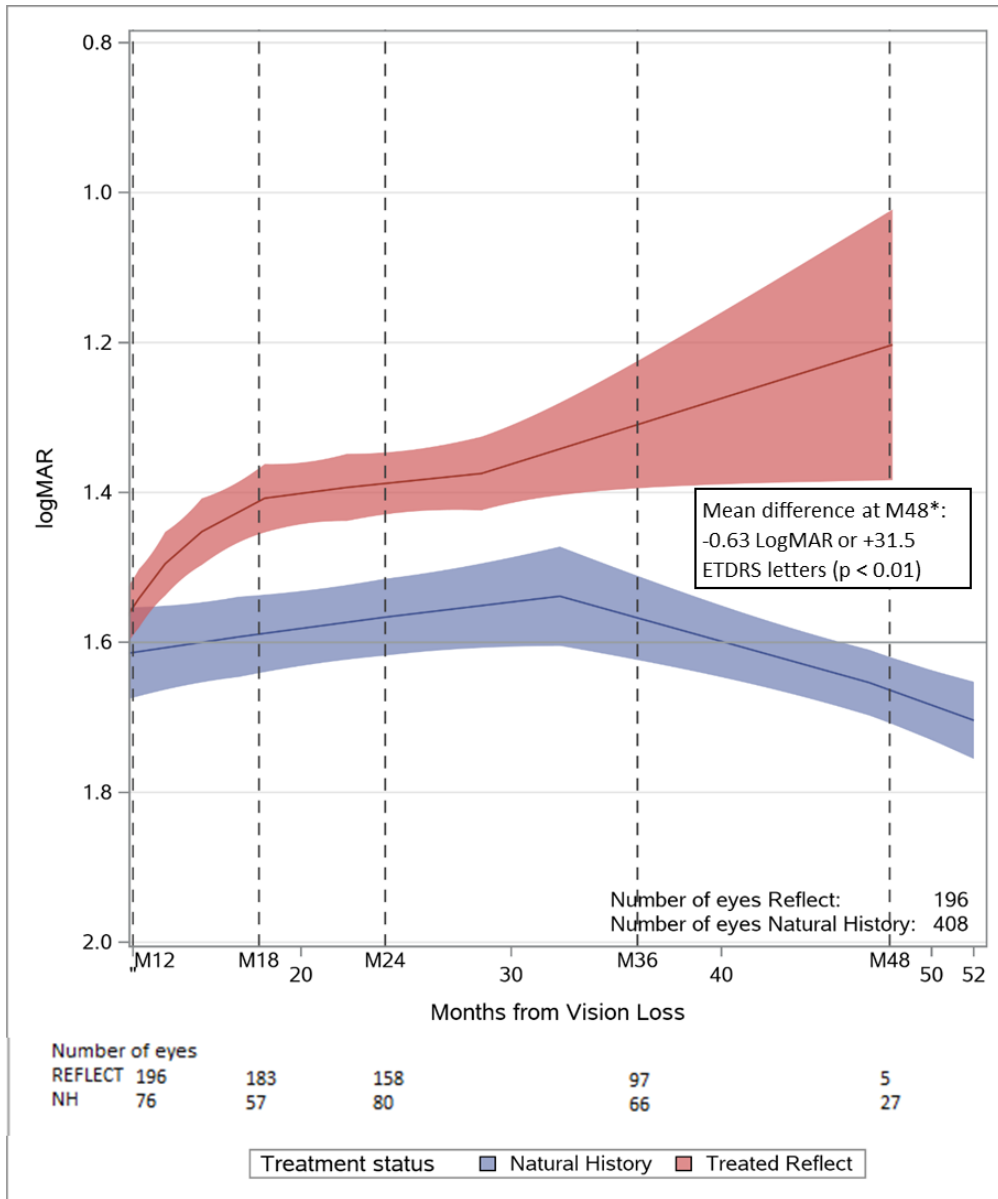

The evolution of visual acuities over time for REFLECT eyes (n=196) and natural history eyes (n=408) was estimated by LOESS regression (solid line) with 95% CI around the fitted curve (shaded area). Visual acuity values > 52 months were assigned to the 52-month timepoint using the next observation carried backward method.

Smoothing parameter: 0.315 for treated eyes and 0.408 for natural history eyes.

The statistically significant difference between treated and natural history eyes is illustrated by the non-overlapping CIs of LOESS curves.

Number of eyes with the closest value to the nominal timepoint is indicated for each group based on the prespecified time windows defined in the Methods.

\*Mean difference (95% CI) at Month 48 [42, 54] was estimated by a mixed-model analysis of covariance with repeated measures.

## **LHON Study Group Information**

*IRCCS Istituto delle Scienze Neurologiche di Bologna, UOC Clinica Neurologica and Programma di Neurogenetica, Bologna, Italy, and Unit of Neurology, Department of Biomedical and Neuromotor Sciences (DIBINEM), University of Bologna, Bologna, Italy:* Valerio Carelli MD, PhD (Principal Investigator REVERSE, RESCUE, RESTORE, REFLECT, Sub-Investigator REALITY), Piero Barboni MD (Surgeon, IVT injections, REVERSE, RESCUE, REFLECT), Michele Carbonelli MD (Sub-Investigator REVERSE, RESCUE, RESTORE, REFLECT, REALITY), Lidia Di Vito MD (Sub-Investigator REVERSE, RESCUE, REALITY), Giulia Amore MD (Sub-Investigator RESTORE, REFLECT), Manuela Contin M.Sc (Pharmacist REVERSE, RESCUE, REFLECT), Susan Mohamed M.Sc (Pharmacist REVERSE, RESCUE, REFLECT), Chiara La Morgia MD, PhD (Principal Investigator REALITY, Sub-Investigator REVERSE, RESCUE, RESTORE, REFLECT, Study Coordinator REVERSE, RESCUE, RESTORE), Martina Romagnoli, PhD (Study Coordinator REFLECT, REALITY), Sara Silvestri (Technician REVERSE, RESCUE); Pietro D'Agati (Technician REFLECT).

*Emory University School of Medicine, Atlanta, Georgia, USA:* Nancy J. Newman MD (Principal Investigator REVERSE, RESCUE, RESTORE, REFLECT, REALITY, International Principal Investigator RESCUE, RESTORE, REFLECT), Valérie Biousse MD (Sub-Investigator REVERSE, RESCUE, RESTORE, REFLECT), George Baker Hubbard MD (Sub-Investigator REVERSE, RESCUE, REFLECT), Ghazala O'Keefe MD (Sub-Investigator REFLECT), Andrew M. Hendrick MD (Sub-Investigator REVERSE, RESCUE), Michael Dattilo MD, PhD (Sub-Investigator REVERSE, RESCUE, RESTORE), Jason H. Peragallo MD (Sub-Investigator REVERSE, RESCUE, REFLECT), Eman Hawy MD (Sub-Investigator REVERSE, RESCUE), Lindreth DuBois MEd, MMSc, COMT (Study Coordinator REVERSE, RESCUE, RESTORE, REFLECT, REALITY), Deborah Gibbs COMT, CCRC, CCRP (Study Coordinator REVERSE, RESCUE, RESTORE, REFLECT), Alcides Fernandes Filho MD (Study Coordinator REVERSE, RESCUE, RESTORE, REFLECT), Jannah Dobbs (OCT/Photographer REVERSE, RESCUE, RESTORE, REFLECT), Andre Aung MD (Sub-Investigator RESTORE).

*Moorfields Eye Hospital, London, UK and UCL Institute of Ophthalmology, University College London, London, UK:* Patrick Yu-Wai-Man MD, PhD (Principal Investigator REVERSE, RESCUE, RESTORE, REFLECT, REALITY, International Principal Investigator REVERSE), James Acheson MD (Sub-Investigator REVERSE, RESCUE), Hayley Boston (Study Coordinator REVERSE, RESCUE, RESTORE, REFLECT), Maria Eleftheriadou MD (Sub-Investigator REVERSE, RESCUE), Simona Esposti MD (Sub-Investigator REVERSE, RESCUE, RESTORE, REFLECT, REALITY), Maria Gemenetzi (REVERSE, RESCUE), Lauren Leitch-Devlin (REVERSE, RESCUE), William R Tucker MD (Sub-Investigator REVERSE, RESCUE, REFLECT), Neringa Jurkute MD (Sub-Investigator REVERSE, RESCUE, RESTORE, REFLECT, REALITY); Asma Burale (Study Coordinator RESTORE, REFLECT); Shweta Anand MD (Sub-Investigator REFLECT); Muhammad A Memon MD (Sub-Investigator REFLECT); Rima Hussain (REALITY); Rasha Jorany (REALITY); Priyansha Sheel (REALITY).

*Wills Eye Hospital and Sidney Kimmel Medical College of Thomas Jefferson University, Philadelphia, PA, USA:* Mark L. Moster MD (Principal Investigator REVERSE, RESCUE,

CLIN 06, REFLECT, REALITY), Robert C. Sergott MD (Head of the Central Reading Center, Annesley EyeBrain Center [AEBC], Vickie and Jack Farber Institute for Neuroscience at Jefferson Health Partnered with Wills Eye Hospital, for REVERSE, RESCUE, RESTORE and REFLECT studies), Melissa SantaMaria (Associate Director - Central Reading Center AEBC), Heather Tollis (Clinical Study Manager - Central Reading Center AEBC), Adam A. DeBusk MD (Sub-Investigator REVERSE, RESCUE, RESTORE, REFLECT, REALITY), Julia A. Haller MD (Surgeon, IVT injections, REVERSE, RESCUE, REFLECT); Maria Massini COT (Study Coordinator REVERSE, RESCUE, RESTORE, REFLECT, REALITY).

*Sue Anschutz-Rodgers/UCHealth Eye Center, University of Colorado School of Medicine, Aurora, CO, USA:* Prem S. Subramanian MD, PhD (Principal Investigator REFLECT), Paula Pecen MD (Surgeon REFLECT), Marc Mathias MD (Surgeon REFLECT), Mary Preston COMT (Study coordinator REFLECT), Steve Cho (Study coordinator REFLECT).

*Centre Hospitalier National d'Ophthalmologie des Quinze Vingts, Paris, France and Department of Neuro Ophthalmology and Emergencies, Rothschild Foundation Hospital, Paris, France:* José A. Sahel MD, PhD, Catherine Vignal-Clermont MD (Principal Investigator REVEAL, REVERSE, RESCUE, RESTORE, REFLECT, REALITY), Jean François Girmens MD (Surgeon, IVT injections, REVEAL, REVERSE, RESCUE, REFLECT), Rabih Hage MD (Sub-Investigator REVEAL, REVERSE, RESCUE, RESTORE, REFLECT, REALITY), Lise Plaine (Study Coordinator), Wahiba Khemliche (Study Coordinator).

*Department of Ophthalmology, Taipei Veterans General Hospital, Taiwan, Republic of China:* An-Guor Wang MD, PhD (Principal Investigator REFLECT), Hui-Chen Cheng MD (Sub-investigator and surgeon REFLECT), Celia Chen MD (Sub-Investigator REFLECT), Jeong-Min Hwang MD (Sub-Investigator REFLECT), Chuanbin Sun MD (Sub-Investigator REFLECT).

*Department of Ophthalmology, Vanderbilt Eye Institute, USA:* Sean Donahue MD, PhD (Principal Investigator REFLECT), Shriji Patel MD (Sub-Investigator REFLECT), Sapna Gangaputra MD (Sub-Investigator REFLECT), Megan Barrett (Study Coordinator REFLECT), Scott Ruark (Study Coordinator REFLECT), Saige Wilkins (Study Coordinator REFLECT).

*Department of Ophthalmology, Universitair Ziekenhuis Gent, Gent, Belgium:* Bart P Leroy MD, PhD (Principal Investigator REFLECT), Julie De Zaeytijd MD, PhD (Sub-Investigator REFLECT), Caroline Van Cauwenbergh, PhD (Study Coordinator REFLECT), Hilde Verhauwen, Registered Nurse (Study Nurse REFLECT).

*Department of Neurology Friedrich-Baur-Institute, and Department of Ophthalmology, University Hospital, Ludwig-Maximilians-University Munich, 80336 Munich, Germany:* Thomas Klopstock MD (Principal Investigator, REVERSE, RESCUE, RESTORE), Claudia B Catarino MD Sub-Investigator, REVERSE, RESCUE, RESTORE), Claudia Priglinger MD (Sub-Investigator, REVERSE, RESCUE, RESTORE), Siegfried Priglinger MD (Sub-Investigator, REVERSE, RESCUE, RESTORE), Günther Rudolph MD (Sub-Investigator, REVERSE, RESCUE, RESTORE), Stephan Thurau MD (Sub-Investigator, REVERSE, RESCUE, RESTORE), Bettina von Livonius MD (Sub-Investigator, REVERSE, RESCUE, RESTORE), Daniel Muth MD (Sub-Investigator, REVERSE, RESCUE, RESTORE), Armin Wolf MD (Sub-

Investigator, Surgeon, IVT injections, REVERSE, RESCUE), Jasmina Al-Tamami (Study Coordinator, REVERSE, RESCUE, RESTORE), Angelika Pressler (Study Coordinator, REVERSE, RESCUE, RESTORE), Cosima Schertler (Study Nurse, REVERSE, RESCUE, RESTORE). *TUMCells Interdisciplinary Center for Cellular Therapies, TUM School of Medicine, Munich, Germany*: Martin Hildebrandt MD (Sub-Investigator, REVERSE, RESCUE), Michael Neuenhahn MD (Sub-Investigator, REVERSE, RESCUE). *Doheny Eye Institute / UCLA School of Medicine Los Angeles, CA, USA*: Alfredo A. Sadun MD, PhD (Principal Investigator REVERSE, RESCUE, RESTORE, REFLECT, REALITY), Gad Heilweil, Rustum Karanjia MD, PhD (Sub-Investigator REVERSE, RESCUE, RESTORE, REFLECT, REALITY), Irena Tsui.

*Department of Ophthalmology, Hospital Universitario Ramon y Cajal, Madrid, Spain*: Gema Rebolleda Fernández, MD, PhD (Principal Investigator REFLECT), Laia Jaumendreu Urquijo, MD, PhD (Surgeon REFLECT), Francisco J. Muñoz Negrete, MD, PhD (Sub-Investigator REFLECT).

*Department of Ophthalmology, Massachusetts Eye and Ear Infirmary, USA*: Elizabeth Fortin MD (Principal Investigator and Surgeon REFLECT), Bart K. Chwalisz MD (Principal Investigator REFLECT), Dean Cestari MD (Principal Investigator REFLECT, REALITY).

*Department of Ophthalmology, Icahn School of Medicine at Mount Sinai (ISMMS), USA*: Rudrani Banik MD (Principal Investigator REFLECT), Katy Tai (Study Coordinator REFLECT).

*Department of Ophthalmology, Institut Catala de Retina, Spain*: Lorena Castillo MD (Principal Investigator REALITY), Virginia Garcia BSc (Study Coordinator REALITY), Antonio Morilla PhD (Study Coordinator REALITY).

*Department of Ophthalmology, University Vita-Salute, IRCCS Ospedale San Raffaele, Milan, Italy*: Francesco Bandello MD (Principal Investigator REALITY), Piero Barboni, MD (Sub-Investigator REALITY), Maria Lucia Cascavilla MD (Sub-Investigator REALITY), Marco Battista MD (Sub-Investigator REALITY), Francesca Calcagno PhD (Study Coordinator REALITY), Adelaide Pina (Study Coordinator REALITY).

*Department of Ophthalmology, CHU Angers - Hôpital Hôtel Dieu, Angers, France*: Stéphanie Leruez MD (Principal Investigator REALITY).

*Department of Ophthalmology, Alkek Eye Center, USA*: Rod Foroozan MD (Principal Investigator REALITY).
